# Supplementary material for: Variation in surface properties, metabolic capping, and antibacterial activity of biosynthesized silver nanoparticles: comparison of bio-fabrication potential in phytohormone-regulated cell cultures and naturally grown plants
Source: Royal Society of Chemistry journal article supplement (doi:10.1039/d0ra08419k), 2020-01-01
Supplement: d0ra08419k1.pdf [file d0ra08419k1.pdf]

**Electronic supplementary information**

**Variation in surface properties, metabolic capping, and antibacterial activity of biosynthesized silver nanoparticles: comparison of bio-fabrication potential in phytohormone-regulated cell cultures and naturally grown plant.**

*Tariq Khan*\*<sup>a,b</sup>, and *Gul Shad Ali*\*<sup>b,c</sup>

<sup>a</sup>Department of Biotechnology, University of Malakand Chakdara Dir Lower, 18800

<sup>b</sup>Plant Molecular and Cell Biology, and Department of Plant Pathology, Mid-Florida Research and Education Center, University of Florida/Institute of Food and Agricultural Sciences, Apopka, FL, USA.

<sup>c</sup>Eukaryo Tech, LLC., Apopka, FL 32703

**\*Corresponding Authors**

\*Email: [tariqkhan@uom.edu.pk](mailto:tariqkhan@uom.edu.pk). Tel: 00923339546605

\*Email: [gsali@ufl.edu](mailto:gsali@ufl.edu).

## **1. Materials and Methods:**

### **1.1. Protocol for Metabolite profiling of AgNPs using LC-MS/MS**

All the samples were analyzed on an Agilent 6220A Time-of-Flight LC/MS operated with (+) ESI-MS for the profiling of secondary metabolites associated with the AgNPs. The Mass spectroscopy system was coupled with the HPLC system Agilent 1100/1200 series system consisting of G1367C HiP-ALS SL autosampler, G1330B FC/ALS Therm thermostat cooler for autosampler, G1379B degasser, and G1312B binary pump.

A ThermoScientific acclaim polar advantage column (C16, 3 $\mu$ m, 2.1 x 150 mm 120 A + guard). was used for LC separation of metabolites for LC-MS analysis. For LC, the mobile phase contained A = H<sub>2</sub>O + 0.1% formic acid and B = 100% Methanol + 0.1% formic acid. The samples were loaded onto the column using 100% A (0 –20 min) at a flow rate of 200  $\mu$ L/min and resolved using a linear increasing gradient of 100% B to 0% A for 24 min (20 –24 min). The gradient for Solvent B was decreased to 0 % B for 35 min (25-35 min).

For MS analysis the positive- (+) ion data were generated by ESI in the mass spectrophotometer. The following conditions were maintained during the process: capillary voltage (3000 V), charging (2000 V), corona (2  $\mu$ A), drying gas flow (8 l/min), fragmentor (120 V), gas temperature (300°C), nebulizer (45 PSIG), octopole radio frequency (250 V), skimmer (60 V), and vaporizer temperature (200°C). The mass spectra were acquired in 4 GHz high-resolution mode at a rate of 1.02 spectra/s and 9,700 transients/spectrum, and data were collected as profiled spectra untargeted metabolites. The data obtained were further analyzed through search in the METLIN database through XCMS online Version 3.7.1 developed by the Scripps institute (<https://xcmsonline.scripps.edu/>). The datasets (WPE-AgNPs; 3 reps, TDZ-AgNPs; 3 reps and MLN-AgNPs; 3 reps) were uploaded to the XCMS online server. The data were analyzed by comparing all treatments in a two-way combination i.e. WPE-AgNPs vs

TDZ, TDZ-AgNPs vs MLN-AgNPs; and WPE-AgNPs Vs MLN-AgNPs) for the common and unique metabolites obtained from the samples. The putative identifications are based on a METLIN search of the accurate mass selected with tolerance in mass difference  $\leq 10$  ppm.

**Table S1: Putative metabolites detected in extracts from TDZ-, MLN- and WPE-AgNPs through LC-MS/MS-based metabolite profiling**

| Feature id | Putative molecules                                                  | Corresponding class of metabolites | Label | Adducts | METLIN ID | m/z     | Mass difference tolerance (ppm) | Retention time (seconds) | Feature intensity |                |                |                |                |                |
|------------|---------------------------------------------------------------------|------------------------------------|-------|---------|-----------|---------|---------------------------------|--------------------------|-------------------|----------------|----------------|----------------|----------------|----------------|
|            |                                                                     |                                    |       |         |           |         |                                 |                          | TDZ-AgNPs mean    | TDZ-AgNPs (sd) | MLN-AgNPs mean | MLN-AgNPs (sd) | WPE-AgNPs mean | WPE-AgNPs (sd) |
| 1.         | 11-Aminoundecanoic acid                                             | Fatty acids                        | *     | M+H     | 265158    | 202.181 | 5                               | 34.707                   | 5549139.340       | 9609563.844    | 0              | 0              | 0              | 0              |
| 2.         | Clostebol propionate                                                | Fatty acid                         | *     | M+H     | 453424    | 379.203 | 0                               | 4.481                    | 33104.789         | 34985.108      | 0              | 0              | 0              | 0              |
| 3.         | Lauryldiethanolamine                                                | Amines                             | \$    | M+H     | 305368    | 274.273 | 4                               | 22.317                   | 0                 | 0              | 209826.572     | 8772.691       | 0              | 0              |
| 4.         | Somocystinamide A                                                   | Lipopeptide                        | \$    | M+H     | 65448     | 627.398 | 1                               | 27.102                   | 0                 | 0              | 434539.834     | 24603.487      | 0              | 0              |
| 5.         | Asp-Lys-Trp-Trp                                                     | Polypeptide                        | \$    | M+K     | 123058    | 672.254 | 0                               | 31.247                   | 0                 | 0              | 1980.376       | 190.846        | 0              | 0              |
| 6.         | <i>N,N</i> -dimethyl-1,1-bis(2-trimethylsilylethoxy)methanamine     | Amines                             | \$    | M+H     | 489395    | 292.213 | 1                               | 31.626                   | 0                 | 0              | 2780.647       | 456.141        | 0              | 0              |
| 7.         | 5-Benzyl 1-methyl N-hexadecanoyl-L-glutamate                        | Amino acid derivative              | \$    | M+Na    | 950451    | 512.334 | 1                               | 26.413                   | 0                 | 0              | 8249.517       | 1577.460       | 0              | 0              |
| 8.         | 2-Decarboxyphyllocactin                                             | Glycosides (Betalains)             | \$    | M+H     | 91522     | 594.169 | 0                               | 27.296                   | 0                 | 0              | 75585.438      | 16519.438      | 0              | 0              |
| 9.         | Correolide                                                          | Nortriterpenoid                    | \$    | M+Na    | 69731     | 811.317 | 3                               | 31.501                   | 0                 | 0              | 1003.384       | 263.284        | 0              | 0              |
| 10.        | Litcubinine                                                         | Alkaloid                           | \$    | M+Na    | 88591     | 337.128 | 0                               | 23.718                   | 0                 | 0              | 2295.927       | 631.041        | 0              | 0              |
| 11.        | <i>N,N</i> -Bis[4-(naphthalen-1-yl)phenyl]perylene-3-amine          | Amines                             | \$    | M+Na    | 975862    | 694.248 | 3                               | 31.237                   | 0                 | 0              | 1645.659       | 460.575        | 0              | 0              |
| 12.        | Trimethylolpropane diacrylate 3-(hexamethyleniminyl)propionate      | Fatty acids                        | \$    | M+NH4   | 378961    | 413.265 | 0                               | 26.715                   | 0                 | 0              | 365045.694     | 120528.412     | 0              | 0              |
| 13.        | 1-[4-(3-phenyl-3H-naphtho[2,1-b]pyran-3-yl)phenyl] Pyrrolidine      | Amines                             | \$    | M+Na    | 634547    | 426.183 | 0                               | 26.040                   | 0                 | 0              | 23763.591      | 8397.453       | 0              | 0              |
| 14.        | 1-octadecanoyl-2-(9Z-octadecenoyl)-sn-glycero-3-phosphoethanolamine | Amines                             | \$    | M+K     | 40425     | 784.525 | 1                               | 27.877                   | 0                 | 0              | 2434080.937    | 908716.108     | 0              | 0              |
| 15.        | Acrimarine N                                                        | Alkaloids                          | \$    | M+K     | 95256     | 596.167 | 1                               | 27.270                   | 0                 | 0              | 30613.396      | 11643.463      | 0              | 0              |
| 16.        | d-alpha-Tocopheryl succinate                                        | Tocopherols                        | \$    | M+H     | 286740    | 531.406 | 3                               | 27.944                   | 0                 | 0              | 1965133.353    | 1015534.816    | 0              | 0              |
| 17.        | N,N-Dibutyltetradecan-1-amine N-oxide                               | Amines                             | \$    | M+H     | 772735    | 342.372 | 2                               | 25.952                   | 0                 | 0              | 4699.354       | 2664.595       | 0              | 0              |

|     |                                                                                                                              |                         |     |       |        |             |   |         |         |         |             |             |             |          |
|-----|------------------------------------------------------------------------------------------------------------------------------|-------------------------|-----|-------|--------|-------------|---|---------|---------|---------|-------------|-------------|-------------|----------|
| 18. | N-Methyldidecylamine                                                                                                         | Amines                  | \$  | M+H   | 290613 | 312.362     | 3 | 25.703  | 0       | 0       | 73927.486   | 42454.686   | 0           | 0        |
| 19. | N-Isodecylisotridecylamine::                                                                                                 | Amines                  | \$  | M+H   | 498950 | 340.392     | 5 | 26.163  | 0       | 0       | 181842.959  | 108547.347  | 0           | 0        |
| 20. | Tris(tridecyl)amine                                                                                                          | Amines                  | \$  | M+H   | 316253 | 564.641     | 6 | 26.889  | 0       | 0       | 71333.774   | 43374.634   | 0           | 0        |
| 21. | N,N-Diundecylundecan-1-amine                                                                                                 | Amines                  | \$  | M+H   | 701327 | 480.548     | 6 | 26.113  | 0       | 0       | 49665.606   | 30199.842   | 0           | 0        |
| 22. | 3-Dodecylamido-N,N'-dimethylpropyl amine oxide                                                                               | Amines                  | \$  | M+H   | 327556 | 300.277     | 1 | 19.253  | 0       | 0       | 74649.548   | 48286.655   | 0           | 0        |
| 23. | 3-hexanoyl-NBD Cholesterol                                                                                                   | Sterols                 | \$  | M+H   | 64806  | 663.451     | 4 | 27.886  | 0       | 0       | 129531.516  | 83899.448   | 0           | 0        |
| 24. | Octacosanamide                                                                                                               | Alkaloids               | \$  | M+H   | 284978 | 424.455     | 8 | 26.388  | 0       | 0       | 2848.393    | 1856.526    | 0           | 0        |
| 25. | 1-hexadecanoyl-2-(9Z-octadecenoyl)-sn-glycero-3-phospho-(1'-rac-glycerol)                                                    | Saponin                 | \$  | M+H   | 40844  | 749.534     | 2 | 27.263  | 0       | 0       | 2466.305    | 1639.352    | 0           | 0        |
| 26. | 1-(13Z,16Z-docosadienoyl)-2-(4Z,7Z,10Z,13Z,16Z,19Z-docosaheptaenoyl)-glycero-3-phosphocholine Phosphatidylcholine(22:2/22:6) | Phospholipids           | \$  | M+NH4 | 78450  | 905.595     | 7 | 26.766  | 0       | 0       | 66350.862   | 44158.651   | 0           | 0        |
| 27. | 3-(Docosyloxy)-N,N-dimethylpropan-1-amine                                                                                    | Amines                  | \$  | M+H   | 911624 | 412.450     | 3 | 26.123  | 0       | 0       | 4829.722    | 3396.245    | 0           | 0        |
| 28. | Val Ile Val Leu Leu                                                                                                          | Polypeptides            | \$  | M+NH4 | 264339 | 573.433     | 2 | 27.353  | 0       | 0       | 3955.435    | 3293.090    | 0           | 0        |
| 29. | 1-[(Diethoxyphosphorothioyl)oxy]-3,4,5-triiodo-1H-pyrazole                                                                   | Alkaloids               | \$  | M+K   | 956221 | 652.691     | 1 | 27.034  | 0       | 0       | 1581.401    | 1370.301    | 0           | 0        |
| 30. | N,1-Bis(tert-butoxycarbonyl)-L-histidine, compound with dicyclohexylamine (1:1)                                              | Amino acids derivatives | \$  | M+NH4 | 471379 | 554.391     | 1 | 27.742  | 0       | 0       | 732323.002  | 707262.887  | 0           | 0        |
| 31. | Furohyperforin                                                                                                               | PolyPhenols             | \$  | M+H   | 89432  | 553.388     | 1 | 27.857  | 0       | 0       | 2248998.201 | 2211622.124 | 0           | 0        |
| 32. | 1-palmitoleoyl-2-(1-enyl-vaccenoyl)-sn-glycero-3-phosphoethanolamine                                                         | Phospholipid            | \$  | M+K   | 60413  | 738.482     | 3 | 27.844  | 0       | 0       | 77674.209   | 77739.277   | 0           | 0        |
| 33. | L-Proline, 1-(4-(((carboxymethyl)methylamino)carbonyl)-2,3,5,6-tetraiodobenzoyl)-                                            | Amino acid derivative   | ‡   | M+K   | 468372 | 876.6586463 | 9 | 26.5595 | 0       | 0       | 0           | 0           | 905.9404742 | 785.2581 |
| 34. | 1-Fluoro-N,N,N',N'-tetramethyl-1-methylidene-lambda~5~-                                                                      | Amines                  | *\$ | M+NH4 | 696914 | 170.121     | 5 | 16.856  | 285.548 | 270.958 | 1914.171    | 391.242     | 0           | 0        |

|     |                                                                                        |                            |     |       |        |             |   |          |             |             |           |           |             |           |
|-----|----------------------------------------------------------------------------------------|----------------------------|-----|-------|--------|-------------|---|----------|-------------|-------------|-----------|-----------|-------------|-----------|
|     | phosphanediamine                                                                       |                            |     |       |        |             |   |          |             |             |           |           |             |           |
| 35. | 3-Chloro-D-alanine--hydrogen chloride (1/1)                                            | Amino acid derivative      | *\$ | M+H   | 631353 | 159.993     | 1 | 7.081    | 2997.863    | 1405.893    | 8779.940  | 482.943   | 0           | 0         |
| 36. | 2-Hexyl decanoic acid                                                                  | Fatty acids                | *\$ | M+H   | 24084  | 257.246     | 4 | 1.272    | 13598.226   | 1836.052    | 23831.542 | 3248.762  | 0           | 0         |
| 37. | D-Mannitol                                                                             | Sugar alcohol              | *\$ | M+H   | 277837 | 183.086     | 0 | 4.198    | 1770.436    | 176.556     | 1103.374  | 8.347     | 0           | 0         |
| 38. | Butanedioic acid, 2,3-dihydroxy-, bis(1-methylethyl) ester, (R,R)-(+/-)                | Carboxylic acid derivative | *\$ | M+NH4 | 311504 | 252.144     | 1 | 24.498   | 763.673     | 1028.886    | 26306.183 | 8957.721  | 0           | 0         |
| 39. | Myristic acid ethyl ester                                                              | Fatty acids                | *\$ | M+H   | 45004  | 257.247     | 3 | 6.217    | 10668.967   | 1779.588    | 27065.589 | 6555.240  | 0           | 0         |
| 40. | Isopalmitic acid                                                                       | Polyketide                 | *\$ | M+H   | 4289   | 257.247     | 3 | 7.898    | 10644.196   | 5781.898    | 47980.206 | 20981.256 | 0           | 0         |
| 41. | 4,8,12-trimethyl-tridecanoic acid                                                      | Fatty acids                | *\$ | M+H   | 34669  | 257.246     | 5 | 8.223    | 20530.777   | 3160.877    | 59654.715 | 25702.426 | 0           | 0         |
| 42. | N,N-Dimethylpentadecan-8-amine                                                         | Amines                     | *\$ | M+H   | 302744 | 256.298     | 6 | 24.575   | 582.186     | 1008.376    | 38516.221 | 26707.264 | 0           | 0         |
| 43. | 4-Ethyltetradecanoic acid                                                              | Fatty acids                | *\$ | M+H   | 292794 | 257.246     | 5 | 0.757    | 53348.415   | 2396.406    | 88650.567 | 36401.728 | 0           | 0         |
| 44. | N,N"-1,4-butanediylbis Urea                                                            | Amide derivative           | *\$ | M+Na  | 280906 | 197.101     | 1 | 23.674   | 39467.847   | 37881.119   | 2827.324  | 1039.853  | 0           | 0         |
| 45. | Octanoic acid, octyl ester                                                             | Fatty acids                | *\$ | M+H   | 345568 | 257.246     | 4 | 2.004    | 36706.465   | 1868.840    | 67990.326 | 37216.392 | 0           | 0         |
| 46. | N,N'-[(Methylsilanediyl)bis(oxy)]bis(N-methylmethanamine)                              | Amines                     | *\$ | M+Na  | 885513 | 187.087     | 0 | 18.462   | 7710.679    | 7977.692    | 2556.030  | 888.296   | 0           | 0         |
| 47. | 7-Methoxychromone                                                                      | Phenylpropanoids           | *\$ | M+H   | 44466  | 177.055     | 2 | 5.692    | 33211.033   | 51108.549   | 2797.158  | 627.428   | 0           | 0         |
| 48. | Ile Met Val Tyr                                                                        | Polypeptide                | *‡  | M+Na  | 163838 | 547.2559349 | 0 | 24.666   | 12526.44178 | 21696.43361 | 0         | 0         | 42704.80148 | 8536.443  |
| 49. | Arg Trp Phe                                                                            | Polypeptides               | *‡  | M+H   | 20924  | 508.2666883 | 0 | 24.47383 | 16669.88997 | 28873.09639 | 0         | 0         | 52958.41577 | 1570.2.62 |
| 50. | beta-D-Galactopyranoside                                                               | Monosaccharides            | *‡  | M+K   | 577112 | 799.4391743 | 0 | 23.81633 | 4153.76522  | 7194.532404 | 0         | 0         | 13391.02221 | 1406.326  |
| 51. | Galactosyl Ceramide                                                                    | Glycolipids                | *‡  | M+K   | 64958  | 896.6947905 | 0 | 28.26267 | 47194.11607 | 81742.60686 | 0         | 0         | 706192.503  | 5178.65.2 |
| 52. | L-Lysyl-L-lysyl-L-tyrosyl-L-leucine                                                    | Polypeptides               | *‡  | M+H   | 907192 | 551.3543041 | 2 | 24.483   | 1342.233109 | 2324.81594  | 0         | 0         | 27467.65757 | 2160.7.59 |
| 53. | Lauryldiethanolamine::M+H::305368::D::1::Octanoic acid, compd. with 1-octanamine (1:1) | Amines                     | *‡  | M+H   | 359700 | 274.2737878 | 1 | 21.369   | 8280.484741 | 14342.22028 | 0         | 0         | 149413.0367 | 1184.93.8 |
| 54. | 4-nitro-1,2,3-trimethyl-1H-Imidazolium                                                 | Alkaloids                  | *‡  | :M+H  | 319769 | 157.0842698 | 2 | 28.99467 | 27064.14618 | 30001.81358 | 0         | 0         | 72716.09205 | 3673.0.98 |
| 55. | 2,5-Difluoro-1H-imidazole-4-carboxylic acid                                            | Alkaloids                  | *‡  | M+H   | 371142 | 149.0157958 | 1 | 30.83925 | 18891.28208 | 20675.34807 | 0         | 0         | 17391.51654 | 3103.954  |

|     |                                                                    |                    |     |       |        |                 |   |          |             |             |             |            |                 |              |
|-----|--------------------------------------------------------------------|--------------------|-----|-------|--------|-----------------|---|----------|-------------|-------------|-------------|------------|-----------------|--------------|
| 56. | 1,3-Bis(propoxymethyl)-2,3-dihydro-1H-imidazol-1-ium chloride      | Alkaloids          | *‡  | M+H   | 893229 | 250.1442<br>646 | 0 | 17.28025 | 37128.81249 | 64308.98965 | 0           | 0          | 65346.<br>91776 | 1846<br>1.74 |
| 57. | punaglandin 5                                                      | Fatty acids        | *‡  | M+K   | 36424  | 537.1652<br>509 | 0 | 26.3765  | 2255.184472 | 3906.094087 | 0           | 0          | 129431<br>.7816 | 1076<br>61   |
| 58. | 5-Diethylamino-2-pentanone                                         | Ketone derivative  | *‡  | M+H   | 270259 | 158.1544<br>564 | 3 | 21.028   | 155.9843663 | 135.0945814 | 0           | 0          | 3378.3<br>79894 | 3086<br>.605 |
| 59. | 2-(Diphenylmethyl)-5-phenyl-1H-benzo[e]isoindole-1,3(2H)-dione     | Alkaloids          | *‡  | M+Na  | 653347 | 462.1462<br>435 | 0 | 25.84633 | 1360.717446 | 2356.83175  | 0           | 0          | 94479.<br>06557 | 9146<br>0.54 |
| 60. | 3,6,9,12,15-Pentaoxaheptadecan-1-ol, 17-(nonylphenoxy)-            | Fatty acids        | *‡  | M+NH4 | 363692 | 502.3738<br>006 | 0 | 24.4995  | 848.4587421 | 1469.573649 | 0           | 0          | 8087.8<br>95137 | 7579<br>.478 |
| 61. | 1,2,3,4,5,6,7,8-octahydro-Xanthylium.                              | Polyphenols        | *‡  | M+Na  | 503715 | 212.1167<br>55  | 2 | 16.14017 | 1399.394013 | 2282.996149 | 0           | 0          | 4383.5<br>98766 | 3504<br>.997 |
| 62. | N-Methyl-N-octadecyl-1-octadecanamine                              | Fatty acids        | *‡  | M+H   | 290222 | 536.6109<br>955 | 4 | 25.24217 | 19424.01303 | 33643.37745 | 0           | 0          | 134907<br>.9419 | 1493<br>53.8 |
| 63. | L-Tryptophyl-L-lysyl-L-tyrosyl-L-methionyl-L-tryptophyl-L-valine   | Polypeptides       | *‡  | M+Na  | 970332 | 934.4306<br>77  | 6 | 30.63458 | 270.7883713 | 469.0192173 | 0           | 0          | 837.88<br>55266 | 732.<br>0389 |
| 64. | N-(2-aminoethyl)-N-[2-[(1-oxooctadecyl)amino]ethyl]-Octadecanamide | Fatty acids        | *‡  | M+Na  | 374729 | 658.6217<br>831 | 0 | 24.88967 | 2251.577767 | 3899.84709  | 0           | 0          | 12853.<br>05142 | 1488<br>8.35 |
| 65. | 2-[benzoyl(2-dodecanoyloxyethyl)amino]ethyl dodecanoate            | Fatty acids        | *‡  | M+K   | 564285 | 612.4021<br>162 | 1 | 24.575   | 1484.53359  | 2571.287603 | 0           | 0          | 3337.3<br>20516 | 1308<br>.381 |
| 66. | 1-[(2-Methoxyphenyl)methyl]piperidine-4-carboxylic acid            | Alkaloids          | *‡  | M+H   | 267180 | 250.1433<br>499 | 2 | 16.51083 | 31186.61963 | 53832.43095 | 0           | 0          | 57877.<br>26484 | 8487<br>.15  |
| 67. | N~1~-(3-Aminopropyl)butane-1,4-diamine--hydrogen chloride (1/1)    | Amines             | *‡  | M+NH4 | 739863 | 199.1684<br>025 | 0 | 1042     | 2130.588942 | 325.1582551 | 0           | 0          | 2445.6<br>98703 | 626.<br>6337 |
| 68. | Ethyl 2-(diethylcarbamoyl)benzoate                                 | Alcohol ester      | *‡  | M+H   | 271154 | 250.1439<br>207 | 1 | 16.9485  | 27743.85723 | 47868.83679 | 0           | 0          | 49874.<br>84597 | 9769<br>.037 |
| 69. | 1-Tetradecanamine, N-methyl-N-tetradecyl                           | Amines             | *‡  | M+H   | 366932 | 424.4852<br>655 | 6 | 24.28283 | 3516.774083 | 6091.231391 | 0           | 0          | 11030.<br>22277 | 1646<br>4.45 |
| 70. | Bisazir                                                            | Amines             | *‡  | M+H   | 330537 | 178.0562<br>348 | 0 | 29.35567 | 2290.220895 | 1320.951923 | 0           | 0          | 1734.6<br>73907 | 614.<br>2076 |
| 71. | 11Z-Hentriacontene                                                 | Alkane hydrocarbon | \$‡ | M+NH4 | 97485  | 452.515         | 8 | 25.896   | 0           | 0           | 25548.186   | 17781.674  | 16957.<br>97715 | 2117<br>2.59 |
| 72. | Loroxanthin ester/<br>Loroxanthin dodecenoate                      | Terpenes           | \$‡ | M+K   | 41412  | 803.540         | 3 | 26.715   | 0           | 0           | 82304.782   | 48559.587  | 44927.<br>03505 | 4058<br>2.62 |
| 73. | Lantadene B                                                        | Terpenes           | \$‡ | M+H   | 506610 | 553.388         | 1 | 28.122   | 0           | 0           | 1825542.087 | 970784.074 | 124621<br>5.694 | 1422<br>537  |

|     |                                                                      |                           |      |       |        |         |   |        |           |           |             |             |             |          |
|-----|----------------------------------------------------------------------|---------------------------|------|-------|--------|---------|---|--------|-----------|-----------|-------------|-------------|-------------|----------|
| 74. | N,N-Dimethyl-1-octadecanamine                                        | Amines                    | \$‡  | M+H   | 288395 | 298.346 | 2 | 25.407 | 0         | 0         | 263332.136  | 135688.135  | 147443.6187 | 116084.4 |
| 75. | 2-[(E)-2-(Acridin-9-yl)ethenyl]-5-(diethylamino)phenyl octadecanoate | Fatty acids               | \$‡  | M+NH4 | 739598 | 652.480 | 6 | 27.944 | 0         | 0         | 4559270.804 | 2233671.821 | 2486784.684 | 2045603  |
| 76. | N-heptadecyl-1-Octadecanamine                                        | Amines                    | \$‡  | M+H   | 589281 | 524.575 | 4 | 26.446 | 0         | 0         | 16323.450   | 8056.867    | 12137.06687 | 11237.65 |
| 77. | 2-Tritriacontanone                                                   | Ketone                    | \$‡  | M+NH4 | 355694 | 496.547 | 4 | 26.263 | 0         | 0         | 2380.893    | 1126.865    | 3523.468965 | 4251.985 |
| 78. | 2-(Pentacosylcarbamoyl)benzoic acid                                  | Aromatic carboxylic acids | \$‡  | M+K   | 951729 | 554.400 | 6 | 25.967 | 0         | 0         | 77394.467   | 32820.011   | 57233.48575 | 45894.7  |
| 79. | Arginine                                                             | Amino Acid                | *\$‡ | M+Na  | 274389 | 197.101 | 0 | 22.850 | 30312.935 | 29167.851 | 378.595     | 167.063     | 933.0944293 | 238.2348 |
| 80. | 14-Amino-3,6,9,12-tetraoxatetradecan-1-oic acid                      | Fatty acid                | *\$‡ | M+H   | 294075 | 252.144 | 0 | 24.988 | 1319.085  | 1147.958  | 46992.132   | 11256.487   | 33676.71269 | 2411.425 |

Labels: \*Compounds detected only in TDZ-AgNPs (1-2); \$MLN-AgNPs only (3-32); ‡WPE-AgNPs only (33); \*\$both in TDZ and MLN-AgNPs (34-47); \*‡TDZ- and WPE-AgNPs (48-70); \$‡MLN and WPE-AgNPs (71-78). \*\$‡Detected in All (79-80).



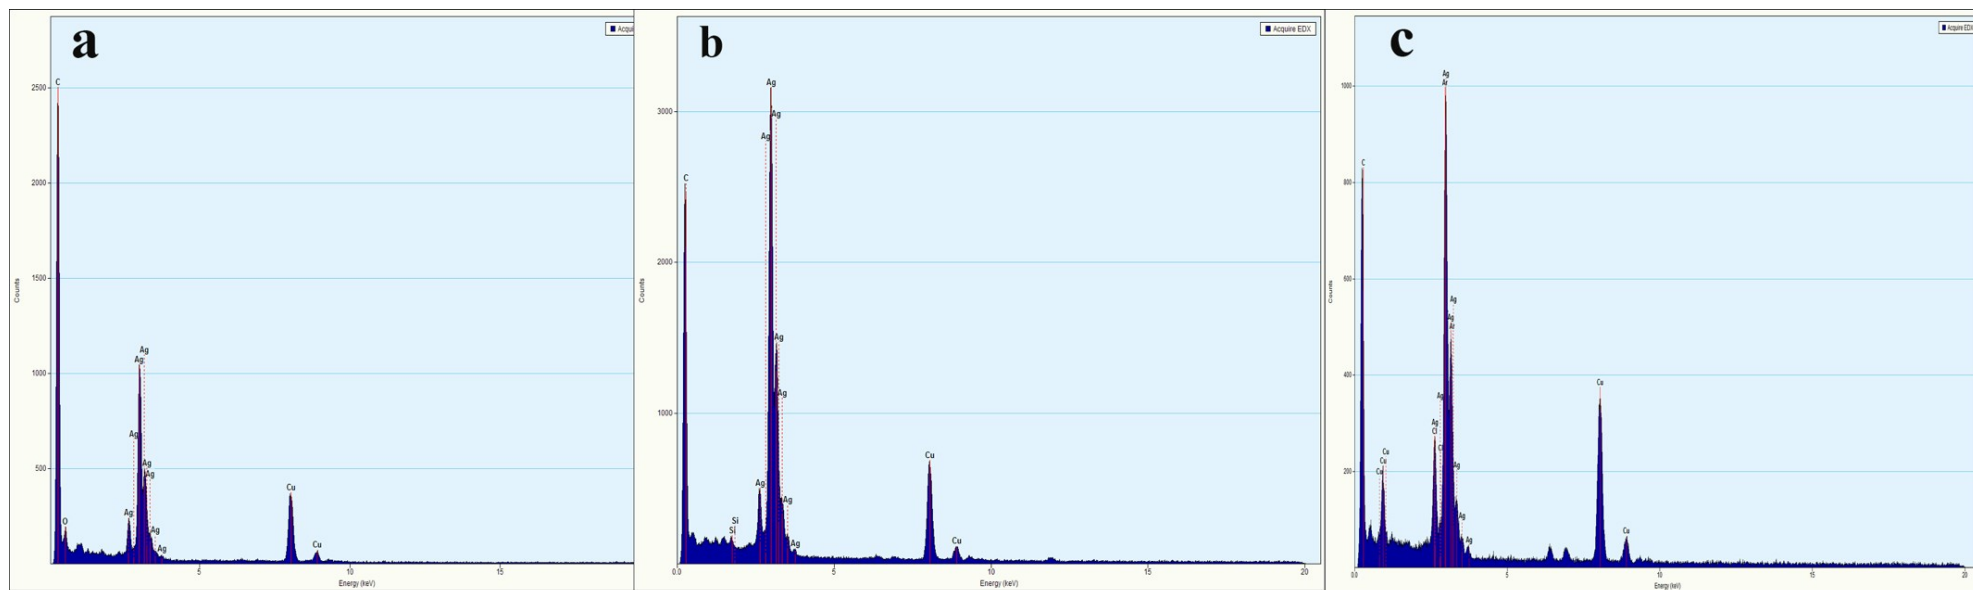

Figure S1: EDX spectra of (a) TDZ-, (b) WPE- and (c) MLN-AgNPs, respectively showing the characteristic peak for Ag. Peaks of C, Si, and Cu, which might result from secondary metabolites in biological extracts are also shown.

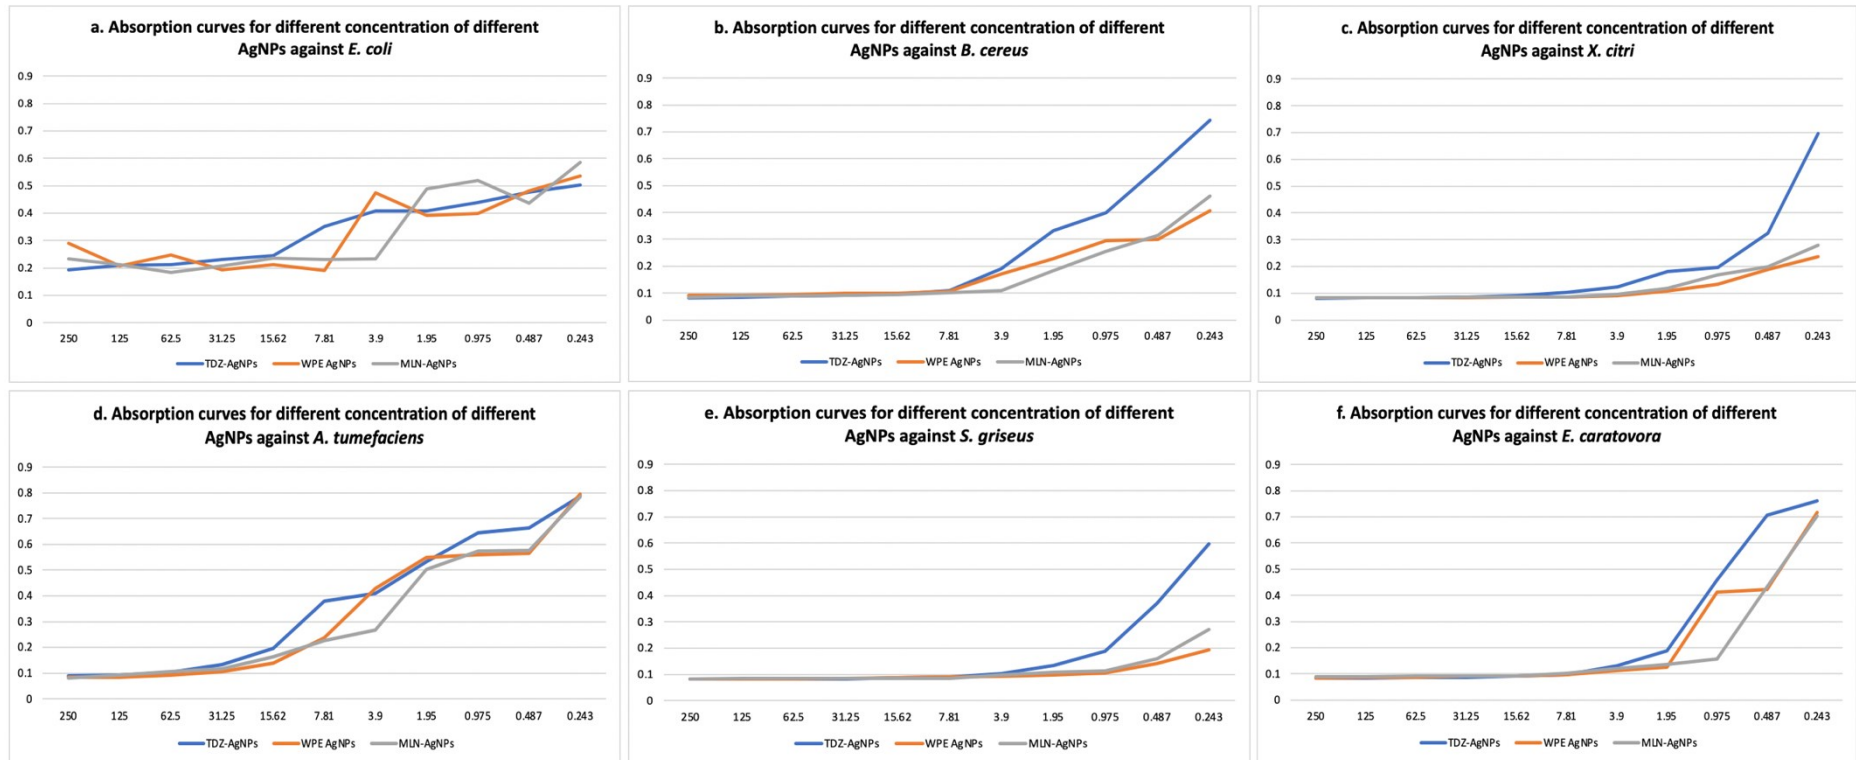

Figure S2: Differential response in terms of absorption of light at OD625 nm during antibacterial activity of MLN-, TDZ- and WPE-AgNPs

**Table S2:** Data on absorption response at OD625 nm during antibacterial activity of MLN-, TDZ- and WPE-AgNPs

| <i>AgNPs Concentration (ug/mL)</i> |                |       |       |       |       |       |       |       |       |       |       |  |
|------------------------------------|----------------|-------|-------|-------|-------|-------|-------|-------|-------|-------|-------|--|
| Types of AgNPs                     | <i>E. coli</i> |       |       |       |       |       |       |       |       |       |       |  |
|                                    | 250            | 125   | 62.5  | 31.25 | 15.62 | 7.81  | 3.9   | 1.95  | 0.975 | 0.487 | 0.243 |  |
| <b>TDZ-AgNPs</b>                   | 0.193          | 0.21  | 0.212 | 0.231 | 0.245 | 0.351 | 0.408 | 0.408 | 0.439 | 0.476 | 0.503 |  |
| <b>WPE AgNPs</b>                   | 0.29           | 0.207 | 0.247 | 0.194 | 0.212 | 0.191 | 0.475 | 0.391 | 0.398 | 0.481 | 0.536 |  |
| <b>MLN-AgNPs</b>                   | 0.234          | 0.213 | 0.183 | 0.207 | 0.236 | 0.232 | 0.233 | 0.489 | 0.52  | 0.436 | 0.586 |  |
|                                    |                |       |       |       |       |       |       |       |       |       |       |  |
| <i>B. cereus</i>                   |                |       |       |       |       |       |       |       |       |       |       |  |
| <b>TDZ-AgNPs</b>                   | 0.083          | 0.085 | 0.09  | 0.091 | 0.096 | 0.11  | 0.192 | 0.332 | 0.399 | 0.568 | 0.743 |  |
| <b>WPE AgNPs</b>                   | 0.092          | 0.092 | 0.094 | 0.1   | 0.1   | 0.106 | 0.17  | 0.228 | 0.294 | 0.3   | 0.407 |  |
| <b>MLN-AgNPs</b>                   | 0.085          | 0.089 | 0.089 | 0.093 | 0.094 | 0.101 | 0.11  | 0.183 | 0.256 | 0.315 | 0.461 |  |
|                                    |                |       |       |       |       |       |       |       |       |       |       |  |
| <i>X. citri</i>                    |                |       |       |       |       |       |       |       |       |       |       |  |
| <b>TDZ-AgNPs</b>                   | 0.081          | 0.083 | 0.083 | 0.086 | 0.09  | 0.104 | 0.123 | 0.181 | 0.197 | 0.324 | 0.695 |  |
| <b>WPE AgNPs</b>                   | 0.083          | 0.083 | 0.083 | 0.084 | 0.085 | 0.085 | 0.09  | 0.109 | 0.134 | 0.188 | 0.237 |  |
| <b>MLN-AgNPs</b>                   | 0.083          | 0.084 | 0.084 | 0.085 | 0.086 | 0.086 | 0.095 | 0.119 | 0.17  | 0.2   | 0.28  |  |
|                                    |                |       |       |       |       |       |       |       |       |       |       |  |
| <i>A. tumefaciens</i>              |                |       |       |       |       |       |       |       |       |       |       |  |
| <b>TDZ-AgNPs</b>                   | 0.089          | 0.092 | 0.104 | 0.133 | 0.197 | 0.379 | 0.41  | 0.533 | 0.646 | 0.663 | 0.787 |  |

|                             |       |       |       |       |       |       |       |       |       |       |       |  |
|-----------------------------|-------|-------|-------|-------|-------|-------|-------|-------|-------|-------|-------|--|
| <b>WPE AgNPs</b>            | 0.085 | 0.085 | 0.091 | 0.105 | 0.139 | 0.236 | 0.429 | 0.548 | 0.56  | 0.566 | 0.795 |  |
| <b>MLN-AgNPs</b>            | 0.082 | 0.091 | 0.105 | 0.118 | 0.162 | 0.227 | 0.268 | 0.502 | 0.574 | 0.576 | 0.786 |  |
|                             |       |       |       |       |       |       |       |       |       |       |       |  |
| <b><i>S. griseus</i></b>    |       |       |       |       |       |       |       |       |       |       |       |  |
| <b>TDZ-AgNPs</b>            | 0.082 | 0.083 | 0.083 | 0.083 | 0.088 | 0.091 | 0.102 | 0.135 | 0.189 | 0.371 | 0.596 |  |
| <b>WPE AgNPs</b>            | 0.083 | 0.083 | 0.083 | 0.086 | 0.088 | 0.091 | 0.092 | 0.099 | 0.106 | 0.143 | 0.194 |  |
| <b>MLN-AgNPs</b>            | 0.082 | 0.084 | 0.085 | 0.086 | 0.086 | 0.086 | 0.099 | 0.108 | 0.114 | 0.16  | 0.271 |  |
|                             |       |       |       |       |       |       |       |       |       |       |       |  |
| <b><i>E. caratovora</i></b> |       |       |       |       |       |       |       |       |       |       |       |  |
| <b>TDZ-AgNPs</b>            | 0.084 | 0.085 | 0.086 | 0.086 | 0.091 | 0.098 | 0.13  | 0.188 | 0.459 | 0.707 | 0.762 |  |
| <b>WPE AgNPs</b>            | 0.083 | 0.086 | 0.086 | 0.091 | 0.091 | 0.096 | 0.112 | 0.126 | 0.411 | 0.423 | 0.718 |  |
| <b>MLN-AgNPs</b>            | 0.09  | 0.09  | 0.091 | 0.092 | 0.092 | 0.102 | 0.119 | 0.136 | 0.156 | 0.433 | 0.703 |  |
